# Supplementary material
Source: HighWire-hosted journal article supplement (doi:10.1101/rna.041129.113)
Supplement: SuppLegends.docx [file SuppLegends.docx]

**Supplementary Figure Legends**

**Figure S1: *rat1-1* effects on Ser2P and RNAPII distribution along the *PMA1* gene.**

A) Schematic representation of the *PMA1* gene*.* The transcription start site (TSS) and the major polyadenylation (pA) sites of *PMA1* are depicted by an arrow and vertical lines, respectively. ChIP primer pair positions (in bp) relative to the TSS are ‘5’’: 49-172; ‘Mid’: 1012-1118; ‘3’UTR’: 3072-3172 and ‘T1’: 3448–3662. Major pA sites are at positions (bp) 2822, 2860, 3261, 3276, 3287 and 3422 relative to the TSS. B) Ratio between Ser2P and Rpb3p ChIP values along the *PMA1* gene in wt and *rat1-1* strains. Ser2P levels were measured using the H5 antibody. ChIP values are relative to the wt Rpb3p signal at the promoter region 5’. C) Rpb3p distribution along the *PMA1* gene in wt or *rat1-1* cells containing empty vector or the Fcp1p expressing plasmid. Strains were grown under inducing conditions as described in Fig 2B. ChIP values are relative to the wt (pRS425) signal at the *PMA1* 5’ region. Averages and standard deviations of all ChIP data were calculated from three independent biological experiments each subjected to triplicate quantitative PCR analysis.

**Figure S2: Suppression of *rat1-1* phenotypes by *rpb1N488D*.**

A) Rpb1 CTD Ser2P distribution along the *GAL1::YLR454W* gene measured by ChIP using the H5 antibody. Strains were grown under inducing conditions as described in Fig 2B. ChIP values are relative to the wt signal at the *YLR454W* promoter region (‘P’). B) Ratios between Ser2P and Rpb1p ChIP values. C) Relative Rpb1p distribution along the *GAL1::YLR454W* gene. Rpb1p ChIP values are normalized to: promoter values (left panel), ‘8’ amplicon values (middle panel) or ‘8.2’ amplicon values (right panel). Averages and standard deviations of all ChIP data were calculated from three independent biological experiments each subjected to triplicate quantitative PCR analysis.

**Figure S3: Fcp1-myc and Ctk1-HA recruitment to *PMA1* in wt and *rat1-1* cells.**

A) Fcp1-myc ChIP efficiency along the *GAL1::YLR454* gene. Raw ChIP data from Fig. 3A are represented as fraction of input. Values correspond to the average of three independent experiments and error bars to the standard deviation of the samples. No antibody control (‘No Ab’) and amplification from an intergenic region are plotted as an estimate for background signals. B) Ctk1-HA/Rpb3 and Fcp1-myc/Rpb3 ChIP ratios using the indicated amplicons along the *PMA1* gene. Note that levels at the 5’ amplicon were close to background and hence not reliable for the Ctk1-HA IPs.

**Figure S4: Ser2P levels in *rat1-D235A* cells.**

Rpb1p Ser2P levels in the indicated whole cell extracts were measured by western blotting analysis Strains transformed with the indicated plasmids ([Kim et al. 2004](#_ENREF_17)) were grown at 30ºC in AA-Leu medium to an OD600 of 0.6, followed by a subsequent incubation at 34ºC for 1 hour, before being harvested for protein extraction and western blotting analysis. Membranes were probed with H5 and Y-80 antibodies as indicated.
